# Supplementary material for: Molecular Docking and Quantitative Structure Activity Relationship (QSAR) Studies of Some Newly Synthesized Poly (Azomethine) Esters
Source: Hindawi journal article supplement (doi:10.1155/2019/2103891), 2019-01-17
Supplement: f1 [file 2103891.f1.pdf]

## Supplementary Information

**Table: LLS results of organic PAME terpolymers in DMSO at 25°C calculated by laser light Scattering technique**

| S. No. | Polymers | M <sub>w</sub><br>g/mol | R <sub>g</sub><br>nm | A <sub>2</sub><br>cm <sup>3</sup> molg <sup>-2</sup> | R <sub>h</sub><br>nm | D <sub>h</sub><br>nm | R <sub>g</sub> /R <sub>h</sub> |
|--------|----------|-------------------------|----------------------|------------------------------------------------------|----------------------|----------------------|--------------------------------|
| 1.     | PAMEH    | 2.3×10 <sup>6</sup>     | 260                  | 6×10 <sup>-5</sup>                                   | 140                  | –                    | 1.85                           |
| 2.     | PAMEB    | 2.1×10 <sup>4</sup>     | 120                  | 3×10 <sup>-3</sup>                                   | –                    | –                    | –                              |
| 3.     | PAMESi   | 6.3×10 <sup>5</sup>     | 169                  | 3.7×10 <sup>-4</sup>                                 | 150                  | –                    | 1.12                           |
| 4.     | PAMEF    | 1.3×10 <sup>5</sup>     | –                    | –                                                    | –                    | –                    | –                              |
| 5.     | PAMEPr   | 2.1×10 <sup>6</sup>     | 306                  | 3.2×10 <sup>-3</sup>                                 | 175                  | –                    | 2.05                           |

\* The specific refractive index increment, dn/dc = 0.097 mL/g for all the polyester-based Polymers  
<sup>a</sup> Weight average molecular weight of the polymer  
<sup>b</sup> Radius of gyration  
<sup>c</sup> Second virial coefficient

The relative errors are: dn/dc, ± 1%, M<sub>w</sub>, ± 5%, <R<sub>g</sub>> & A<sub>2</sub>, ± 10%

1. Zhang, G., Wu, C., Folding and formation of mesoglobules in dilute copolymer solutions, *Adv. Polym. Sci.*, **2006**, *195*, 101-176.
2. Zimm, B. H., Apparatus and Methods for Measurement and Interpretation of the Angular Variation of Light Scattering: Preliminary Results on Polystyrene Solutions. *J. Chem. Phys.*, **1948**, *16*, 1099.
